# Supplementary material for: A synthetic receptor platform enables rapid and portable monitoring of liver dysfunction via engineered bacteria
Source: bioRxiv preprint, doi:10.1101/2021.03.24.436753, version 1 (2021-03-29)
Supplement: Flow repository IDs [file 436753_file05.xlsx]

## Sheet: Feuil1
Experiment ID	Repository ID @ flowrespository.org
HungJu_2021_Fig.2b	FR-FCM-Z3K6
HungJu_2021_Fig.2d	FR-FCM-Z3KL
HungJu_2021_Fig.2e	FR-FCM-Z3KM
HungJu_2021_Fig.3e_V3_V7_V11	FR-FCM-Z3KT
HungJu_2021_Fig.3e_V14_V16_V18	FR-FCM-Z3KU
HungJu_2021_Fig.3e_V19_V22_V78	FR-FCM-Z3KV
HungJu_2021_Fig.S3A	FR-FCM-Z3KR
HungJu_2021_Fig.S3B_right pannel	FR-FCM-Z3LZ
