# Supplementary material for: A synthetic receptor platform enables rapid and portable monitoring of liver dysfunction via engineered bacteria
Source: bioRxiv preprint, doi:10.1101/2021.03.24.436753, version 1 (2021-03-29)
Supplement: NGS data [file 436753_file04.xlsx]

## Sheet: Feuil1
ID	A	B
Exp	Full library	Sensitives (Response to 80 uM TCA)
Total	2983350	317625		Note	The number labeled in the end of protein sequences refer to different NNK DNA sequence for the same amino acid composistion. For example: GGGG1 = "ggg ggg ggg ggg" and GGGG2 = "ggg ggg ggg ggt"
GGGG1	4	0
GGGG2	1	0
GGGE1	5	0
GGGD1	1	0
GGGV1	5	0
GGGV2	0	0
GGGA1	10	0
GGGA2	2	0
GGGR1	36	0
GGGS1	6	0
GGGK1	14	0
GGGN1	4	0
GGGM1	6	0
GGGI1	0	0
GGGT1	50	0
GGGT2	9	0
GGGW1	52	0
GGGC1	26	0
GGG*1	19	0
GGGY1	2	0
GGGL1	12	0
GGGF1	13	0
GGGS2	19	0
GGGS3	34	0
GGGR2	54	0
GGGR3	16	0
GGGQ1	5	0
GGGH1	12	0
GGGL2	4	0
GGGL3	0	0
GGGP1	2	0
GGGP2	16	0
GGGG3	89	0
GGGG4	34	0
GGGE2	13	0
GGGD2	1	0
GGGV3	14	0
GGGV4	5	0
GGGA3	37	0
GGGA4	46	0
GGGR4	2	0
GGGS4	50	0
GGGK2	0	0
GGGN2	4	0
GGGM2	4	0
GGGI2	0	0
GGGT3	21	0
GGGT4	0	0
GGGW2	41	0
GGGC2	0	0
GGG*2	27	0
GGGY2	0	0
GGGL4	8	0
GGGF2	0	0
GGGS5	35	0
GGGS6	22	0
GGGR5	63	0
GGGR6	0	0
GGGQ2	15	0
GGGH2	8	0
GGGL5	0	0
GGGL6	0	0
GGGP3	10	0
GGGP4	0	0
GGEG1	160	0
GGEG2	15	0
GGEE1	6	0
GGED1	7	0
GGEV1	11	0
GGEV2	4	0
GGEA1	27	0
GGEA2	0	0
GGER1	0	0
GGES1	0	0
GGEK1	8	0
GGEN1	6	0
GGEM1	0	0
GGEI1	0	0
GGET1	37	0
GGET2	28	0
GGEW1	0	0
GGEC1	1	0
GGE*1	5	0
GGEY1	0	0
GGEL1	8	0
GGEF1	8	0
GGES2	0	0
GGES3	0	0
GGER2	58	0
GGER3	0	0
GGEQ1	2	0
GGEH1	0	0
GGEL2	0	0
GGEL3	0	0
GGEP1	7	0
GGEP2	0	0
GGDG1	23	0
GGDG2	0	0
GGDE1	4	0
GGDD1	0	0
GGDV1	0	0
GGDV2	1	0
GGDA1	42	0
GGDA2	3	0
GGDR1	1	0
GGDS1	0	0
GGDK1	0	0
GGDN1	0	0
GGDM1	0	0
GGDI1	0	0
GGDT1	0	0
GGDT2	0	0
GGDW1	0	0
GGDC1	0	0
GGD*1	0	0
GGDY1	0	0
GGDL1	0	0
GGDF1	0	0
GGDS2	0	0
GGDS3	0	0
GGDR2	11	0
GGDR3	0	0
GGDQ1	0	0
GGDH1	5	0
GGDL2	0	0
GGDL3	0	0
GGDP1	0	0
GGDP2	0	0
GGVG1	83	0
GGVG2	30	0
GGVE1	4	0
GGVD1	23	0
GGVV1	17	0
GGVV2	7	0
GGVA1	36	0
GGVA2	9	0
GGVR1	4	0
GGVS1	1	0
GGVK1	0	0
GGVN1	0	0
GGVM1	0	0
GGVI1	0	0
GGVT1	41	0
GGVT2	0	0
GGVW1	40	0
GGVC1	0	0
GGV*1	8	0
GGVY1	1	0
GGVL1	0	0
GGVF1	3	0
GGVS2	0	0
GGVS3	0	0
GGVR2	3	0
GGVR3	1	0
GGVQ1	9	0
GGVH1	0	0
GGVL2	11	0
GGVL3	0	0
GGVP1	25	0
GGVP2	0	0
GGVG3	28	0
GGVG4	11	0
GGVE2	0	0
GGVD2	0	0
GGVV3	5	0
GGVV4	0	0
GGVA3	18	0
GGVA4	12	0
GGVR4	43	0
GGVS4	0	0
GGVK2	0	0
GGVN2	5	0
GGVM2	35	0
GGVI2	37	0
GGVT3	0	0
GGVT4	0	0
GGVW2	4	0
GGVC2	0	0
GGV*2	25	0
GGVY2	0	0
GGVL4	0	0
GGVF2	2	0
GGVS5	0	0
GGVS6	4	0
GGVR5	0	0
GGVR6	5	0
GGVQ2	0	0
GGVH2	9	0
GGVL5	0	0
GGVL6	0	0
GGVP3	0	0
GGVP4	0	0
GGAG1	168	0
GGAG2	3	0
GGAE1	81	0
GGAD1	0	0
GGAV1	58	0
GGAV2	51	0
GGAA1	62	0
GGAA2	6	0
GGAR1	34	0
GGAS1	1	0
GGAK1	0	0
GGAN1	0	0
GGAM1	18	0
GGAI1	1	0
GGAT1	1	0
GGAT2	0	0
GGAW1	52	0
GGAC1	6	0
GGA*1	0	0
GGAY1	12	0
GGAL1	6	0
GGAF1	13	0
GGAS2	51	0
GGAS3	0	0
GGAR2	30	0
GGAR3	0	0
GGAQ1	7	0
GGAH1	0	0
GGAL2	3	0
GGAL3	0	0
GGAP1	14	0
GGAP2	0	0
GGAG3	18	0
GGAG4	23	0
GGAE2	25	0
GGAD2	1	0
GGAV3	32	0
GGAV4	0	0
GGAA3	0	0
GGAA4	6	0
GGAR4	16	0
GGAS4	6	0
GGAK2	0	0
GGAN2	16	0
GGAM2	0	0
GGAI2	4	0
GGAT3	13	0
GGAT4	0	0
GGAW2	16	0
GGAC2	4	0
GGA*2	7	0
GGAY2	38	0
GGAL4	0	0
GGAF2	0	0
GGAS5	5	0
GGAS6	0	0
GGAR5	2	0
GGAR6	9	0
GGAQ2	0	0
GGAH2	0	0
GGAL5	0	0
GGAL6	0	0
GGAP3	0	0
GGAP4	6	0
GGRG1	9	0
GGRG2	0	0
GGRE1	6	0
GGRD1	2	0
GGRV1	0	0
GGRV2	19	0
GGRA1	21	0
GGRA2	13	0
GGRR1	27	0
GGRS1	22	0
GGRK1	0	0
GGRN1	0	0
GGRM1	3	0
GGRI1	0	0
GGRT1	0	0
GGRT2	0	0
GGRW1	1	0
GGRC1	6	0
GGR*1	0	0
GGRY1	11	0
GGRL1	0	0
GGRF1	0	0
GGRS2	4	0
GGRS3	0	0
GGRR2	7	0
GGRR3	22	0
GGRQ1	11	0
GGRH1	0	0
GGRL2	0	0
GGRL3	0	0
GGRP1	12	0
GGRP2	26	0
GGSG1	27	0
GGSG2	3	0
GGSE1	9	0
GGSD1	14	0
GGSV1	0	0
GGSV2	0	0
GGSA1	6	0
GGSA2	1	0
GGSR1	10	0
GGSS1	0	0
GGSK1	0	0
GGSN1	0	0
GGSM1	0	0
GGSI1	0	0
GGST1	8	0
GGST2	0	0
GGSW1	4	0
GGSC1	0	0
GGS*1	7	0
GGSY1	0	0
GGSL1	0	0
GGSF1	0	0
GGSS2	0	0
GGSS3	0	0
GGSR2	8	0
GGSR3	47	0
GGSQ1	0	0
GGSH1	0	0
GGSL2	0	0
GGSL3	0	0
GGSP1	36	0
GGSP2	15	0
GGKG1	16	0
GGKG2	0	0
GGKE1	19	0
GGKD1	4	0
GGKV1	0	0
GGKV2	0	0
GGKA1	0	0
GGKA2	0	0
GGKR1	15	0
GGKS1	0	0
GGKK1	0	0
GGKN1	0	0
GGKM1	0	0
GGKI1	0	0
GGKT1	0	0
GGKT2	3	0
GGKW1	0	0
GGKC1	0	0
GGK*1	0	0
GGKY1	0	0
GGKL1	3	0
GGKF1	0	0
GGKS2	0	0
GGKS3	0	0
GGKR2	0	0
GGKR3	1	0
GGKQ1	0	0
GGKH1	0	0
GGKL2	2	0
GGKL3	0	0
GGKP1	0	0
GGKP2	0	0
GGNG1	32	0
GGNG2	0	0
GGNE1	0	0
GGND1	0	0
GGNV1	39	0
GGNV2	0	0
GGNA1	0	0
GGNA2	0	0
GGNR1	17	0
GGNS1	0	0
GGNK1	0	0
GGNN1	0	0
GGNM1	0	0
GGNI1	0	0
GGNT1	1	0
GGNT2	0	0
GGNW1	0	0
GGNC1	0	0
GGN*1	25	0
GGNY1	0	0
GGNL1	0	0
GGNF1	0	0
GGNS2	0	0
GGNS3	0	0
GGNR2	0	0
GGNR3	0	0
GGNQ1	0	0
GGNH1	6	0
GGNL2	0	0
GGNL3	1	0
GGNP1	0	0
GGNP2	0	0
GGMG1	12	0
GGMG2	18	0
GGME1	21	0
GGMD1	2	0
GGMV1	0	0
GGMV2	0	0
GGMA1	12	0
GGMA2	32	0
GGMR1	0	0
GGMS1	0	0
GGMK1	0	0
GGMN1	0	0
GGMM1	0	0
GGMI1	0	0
GGMT1	0	0
GGMT2	0	0
GGMW1	1	0
GGMC1	0	0
GGM*1	0	0
GGMY1	0	0
GGML1	0	0
GGMF1	0	0
GGMS2	0	0
GGMS3	0	0
GGMR2	16	0
GGMR3	0	0
GGMQ1	0	0
GGMH1	0	0
GGML2	0	0
GGML3	0	0
GGMP1	1	0
GGMP2	0	0
GGIG1	4	0
GGIG2	0	0
GGIE1	15	0
GGID1	0	0
GGIV1	0	0
GGIV2	0	0
GGIA1	7	0
GGIA2	3	0
GGIR1	0	0
GGIS1	0	0
GGIK1	0	0
GGIN1	0	0
GGIM1	0	0
GGII1	0	0
GGIT1	0	0
GGIT2	0	0
GGIW1	0	0
GGIC1	0	0
GGI*1	0	0
GGIY1	0	0
GGIL1	0	0
GGIF1	0	0
GGIS2	0	0
GGIS3	0	0
GGIR2	0	0
GGIR3	0	0
GGIQ1	0	0
GGIH1	0	0
GGIL2	0	0
GGIL3	0	0
GGIP1	0	0
GGIP2	0	0
GGTG1	29	0
GGTG2	1	0
GGTE1	0	0
GGTD1	0	0
GGTV1	7	0
GGTV2	0	0
GGTA1	31	0
GGTA2	21	0
GGTR1	6	0
GGTS1	12	0
GGTK1	0	0
GGTN1	0	0
GGTM1	0	0
GGTI1	5	0
GGTT1	0	0
GGTT2	0	0
GGTW1	0	0
GGTC1	0	0
GGT*1	0	0
GGTY1	0	0
GGTL1	0	0
GGTF1	0	0
GGTS2	0	0
GGTS3	0	0
GGTR2	0	0
GGTR3	0	0
GGTQ1	0	0
GGTH1	0	0
GGTL2	0	0
GGTL3	9	0
GGTP1	19	0
GGTP2	1	0
GGTG3	0	0
GGTG4	13	0
GGTE2	0	0
GGTD2	0	0
GGTV3	0	0
GGTV4	0	0
GGTA3	32	0
GGTA4	0	0
GGTR4	0	0
GGTS4	0	0
GGTK2	0	0
GGTN2	0	0
GGTM2	0	0
GGTI2	0	0
GGTT3	0	0
GGTT4	0	0
GGTW2	0	0
GGTC2	8	0
GGT*2	0	0
GGTY2	0	0
GGTL4	0	0
GGTF2	0	0
GGTS5	0	0
GGTS6	18	0
GGTR5	0	0
GGTR6	0	0
GGTQ2	0	0
GGTH2	1	0
GGTL5	0	0
GGTL6	0	0
GGTP3	8	0
GGTP4	1	0
GGWG1	41	0
GGWG2	10	0
GGWE1	1	0
GGWD1	0	0
GGWV1	0	0
GGWV2	20	0
GGWA1	7	0
GGWA2	28	0
GGWR1	31	0
GGWS1	0	0
GGWK1	0	0
GGWN1	63	0
GGWM1	33	0
GGWI1	0	0
GGWT1	0	0
GGWT2	11	0
GGWW1	20	0
GGWC1	1	0
GGW*1	0	0
GGWY1	0	0
GGWL1	13	0
GGWF1	1	0
GGWS2	7	0
GGWS3	0	0
GGWR2	34	0
GGWR3	42	0
GGWQ1	0	0
GGWH1	0	0
GGWL2	31	0
GGWL3	4	0
GGWP1	0	0
GGWP2	0	0
GGCG1	101	0
GGCG2	4	0
GGCE1	31	0
GGCD1	0	0
GGCV1	24	0
GGCV2	37	0
GGCA1	6	0
GGCA2	1	0
GGCR1	0	0
GGCS1	4	0
GGCK1	0	0
GGCN1	0	0
GGCM1	0	0
GGCI1	4	0
GGCT1	0	0
GGCT2	0	0
GGCW1	0	0
GGCC1	0	0
GGC*1	0	0
GGCY1	0	0
GGCL1	0	0
GGCF1	33	0
GGCS2	0	0
GGCS3	1	0
GGCR2	0	0
GGCR3	21	0
GGCQ1	2	0
GGCH1	0	0
GGCL2	8	0
GGCL3	0	0
GGCP1	3	0
GGCP2	0	0
GG*G1	27	0
GG*G2	0	0
GG*E1	16	0
GG*D1	0	0
GG*V1	0	0
GG*V2	0	0
GG*A1	9	0
GG*A2	7	0
GG*R1	7	0
GG*S1	0	0
GG*K1	0	0
GG*N1	0	0
GG*M1	0	0
GG*I1	0	0
GG*T1	0	0
GG*T2	0	0
GG*W1	0	0
GG*C1	0	0
GG**1	0	0
GG*Y1	16	0
GG*L1	0	0
GG*F1	21	0
GG*S2	0	0
GG*S3	6	0
GG*R2	0	0
GG*R3	0	0
GG*Q1	0	0
GG*H1	0	0
GG*L2	0	0
GG*L3	0	0
GG*P1	0	0
GG*P2	0	0
GGYG1	0	0
GGYG2	17	0
GGYE1	0	0
GGYD1	0	0
GGYV1	12	0
GGYV2	6	0
GGYA1	21	0
GGYA2	0	0
GGYR1	0	0
GGYS1	0	0
GGYK1	0	0
GGYN1	0	0
GGYM1	0	0
GGYI1	0	0
GGYT1	0	0
GGYT2	0	0
GGYW1	0	0
GGYC1	0	0
GGY*1	0	0
GGYY1	0	0
GGYL1	1	0
GGYF1	8	0
GGYS2	0	0
GGYS3	4	0
GGYR2	0	0
GGYR3	6	0
GGYQ1	0	0
GGYH1	0	0
GGYL2	0	0
GGYL3	0	0
GGYP1	0	0
GGYP2	30	0
GGLG1	19	0
GGLG2	0	0
GGLE1	0	0
GGLD1	0	0
GGLV1	0	0
GGLV2	24	0
GGLA1	2	0
GGLA2	0	0
GGLR1	6	0
GGLS1	0	0
GGLK1	0	0
GGLN1	0	0
GGLM1	0	0
GGLI1	1	0
GGLT1	0	0
GGLT2	0	0
GGLW1	0	0
GGLC1	0	0
GGL*1	0	0
GGLY1	15	0
GGLL1	0	0
GGLF1	0	0
GGLS2	7	0
GGLS3	0	0
GGLR2	2	0
GGLR3	3	0
GGLQ1	0	0
GGLH1	0	0
GGLL2	0	0
GGLL3	0	0
GGLP1	2	0
GGLP2	0	0
GGFG1	27	0
GGFG2	14	0
GGFE1	13	0
GGFD1	4	0
GGFV1	0	0
GGFV2	0	0
GGFA1	0	0
GGFA2	0	0
GGFR1	3	0
GGFS1	5	0
GGFK1	0	0
GGFN1	0	0
GGFM1	0	0
GGFI1	0	0
GGFT1	0	0
GGFT2	0	0
GGFW1	0	0
GGFC1	0	0
GGF*1	0	0
GGFY1	14	0
GGFL1	0	0
GGFF1	0	0
GGFS2	0	0
GGFS3	0	0
GGFR2	0	0
GGFR3	1	0
GGFQ1	0	0
GGFH1	0	0
GGFL2	0	0
GGFL3	3	0
GGFP1	0	0
GGFP2	11	0
GGSG3	31	0
GGSG4	15	0
GGSE2	1	0
GGSD2	0	0
GGSV3	6	0
GGSV4	0	0
GGSA3	17	0
GGSA4	0	0
GGSR4	0	0
GGSS4	0	0
GGSK2	0	0
GGSN2	5	0
GGSM2	6	0
GGSI2	0	0
GGST3	0	0
GGST4	0	0
GGSW2	0	0
GGSC2	0	0
GGS*2	0	0
GGSY2	0	0
GGSL4	0	0
GGSF2	0	0
GGSS5	9	0
GGSS6	0	0
GGSR5	9	0
GGSR6	0	0
GGSQ2	0	0
GGSH2	0	0
GGSL5	17	0
GGSL6	19	0
GGSP3	6	0
GGSP4	0	0
GGSG5	1	0
GGSG6	23	0
GGSE3	0	0
GGSD3	21	0
GGSV5	2	0
GGSV6	0	0
GGSA5	0	0
GGSA6	0	0
GGSR7	5	0
GGSS7	0	0
GGSK3	0	0
GGSN3	0	0
GGSM3	0	0
GGSI3	0	0
GGST5	0	0
GGST6	1	0
GGSW3	0	0
GGSC3	1	0
GGS*3	0	0
GGSY3	8	0
GGSL7	2	0
GGSF3	0	0
GGSS8	0	0
GGSS9	9	0
GGSR8	0	0
GGSR9	0	0
GGSQ3	0	0
GGSH3	0	0
GGSL8	0	0
GGSL9	0	0
GGSP5	0	0
GGSP6	4	0
GGRG3	234	0
GGRG4	10	0
GGRE2	62	0
GGRD2	52	0
GGRV3	30	0
GGRV4	23	0
GGRA3	48	0
GGRA4	35	0
GGRR4	0	0
GGRS4	26	0
GGRK2	0	0
GGRN2	0	0
GGRM2	0	0
GGRI2	0	0
GGRT3	34	0
GGRT4	0	0
GGRW2	63	0
GGRC2	3	0
GGR*2	27	0
GGRY2	0	0
GGRL4	31	0
GGRF2	0	0
GGRS5	16	0
GGRS6	8	0
GGRR5	13	0
GGRR6	13	0
GGRQ2	39	0
GGRH2	6	0
GGRL5	30	0
GGRL6	0	0
GGRP3	25	0
GGRP4	0	0
GGRG5	118	0
GGRG6	2	0
GGRE3	0	0
GGRD3	1	0
GGRV5	9	0
GGRV6	0	0
GGRA5	29	0
GGRA6	28	0
GGRR7	0	0
GGRS7	0	0
GGRK3	4	0
GGRN3	0	0
GGRM3	0	0
GGRI3	9	0
GGRT5	0	0
GGRT6	1	0
GGRW3	13	0
GGRC3	4	0
GGR*3	2	0
GGRY3	0	0
GGRL7	0	0
GGRF3	0	0
GGRS8	12	0
GGRS9	7	0
GGRR8	8	0
GGRR9	0	0
GGRQ3	10	0
GGRH3	0	0
GGRL8	0	0
GGRL9	0	0
GGRP5	0	0
GGRP6	0	0
GGQG1	7	0
GGQG2	0	0
GGQE1	10	0
GGQD1	0	0
GGQV1	10	0
GGQV2	0	0
GGQA1	23	0
GGQA2	0	0
GGQR1	0	0
GGQS1	0	0
GGQK1	0	0
GGQN1	0	0
GGQM1	0	0
GGQI1	0	0
GGQT1	0	0
GGQT2	0	0
GGQW1	0	0
GGQC1	0	0
GGQ*1	8	0
GGQY1	0	0
GGQL1	5	0
GGQF1	1	0
GGQS2	3	0
GGQS3	0	0
GGQR2	20	0
GGQR3	25	0
GGQQ1	0	0
GGQH1	0	0
GGQL2	1	0
GGQL3	0	0
GGQP1	0	0
GGQP2	0	0
GGHG1	0	0
GGHG2	0	0
GGHE1	1	0
GGHD1	0	0
GGHV1	0	0
GGHV2	0	0
GGHA1	0	0
GGHA2	16	0
GGHR1	0	0
GGHS1	0	0
GGHK1	0	0
GGHN1	0	0
GGHM1	0	0
GGHI1	0	0
GGHT1	0	0
GGHT2	1	0
GGHW1	0	0
GGHC1	0	0
GGH*1	0	0
GGHY1	0	0
GGHL1	0	0
GGHF1	0	0
GGHS2	2	0
GGHS3	0	0
GGHR2	0	0
GGHR3	2	0
GGHQ1	0	0
GGHH1	0	0
GGHL2	0	0
GGHL3	0	0
GGHP1	8	0
GGHP2	0	0
GGLG3	6	0
GGLG4	19	0
GGLE2	0	0
GGLD2	0	0
GGLV3	0	0
GGLV4	0	0
GGLA3	31	0
GGLA4	0	0
GGLR4	0	0
GGLS4	1	0
GGLK2	8	0
GGLN2	0	0
GGLM2	0	0
GGLI2	29	0
GGLT3	0	0
GGLT4	0	0
GGLW2	33	0
GGLC2	19	0
GGL*2	0	0
GGLY2	0	0
GGLL4	0	0
GGLF2	0	0
GGLS5	0	0
GGLS6	23	0
GGLR5	0	0
GGLR6	1	0
GGLQ2	23	0
GGLH2	0	0
GGLL5	0	0
GGLL6	0	0
GGLP3	0	0
GGLP4	0	0
GGLG5	17	0
GGLG6	0	0
GGLE3	0	0
GGLD3	6	0
GGLV5	0	0
GGLV6	0	0
GGLA5	0	0
GGLA6	0	0
GGLR7	37	0
GGLS7	0	0
GGLK3	0	0
GGLN3	0	0
GGLM3	0	0
GGLI3	0	0
GGLT5	0	0
GGLT6	0	0
GGLW3	20	0
GGLC3	0	0
GGL*3	0	0
GGLY3	8	0
GGLL7	3	0
GGLF3	9	0
GGLS8	0	0
GGLS9	0	0
GGLR8	0	0
GGLR9	0	0
GGLQ3	0	0
GGLH3	0	0
GGLL8	0	0
GGLL9	0	0
GGLP5	0	0
GGLP6	0	0
GGPG1	26	0
GGPG2	36	0
GGPE1	0	0
GGPD1	0	0
GGPV1	20	0
GGPV2	19	0
GGPA1	9	0
GGPA2	6	0
GGPR1	0	0
GGPS1	0	0
GGPK1	0	0
GGPN1	14	0
GGPM1	12	0
GGPI1	11	0
GGPT1	14	0
GGPT2	0	0
GGPW1	0	0
GGPC1	0	0
GGP*1	0	0
GGPY1	0	0
GGPL1	0	0
GGPF1	0	0
GGPS2	8	0
GGPS3	0	0
GGPR2	33	0
GGPR3	9	0
GGPQ1	0	0
GGPH1	0	0
GGPL2	0	0
GGPL3	1	0
GGPP1	1	0
GGPP2	11	0
GGPG3	28	0
GGPG4	5	0
GGPE2	0	0
GGPD2	0	0
GGPV3	0	0
GGPV4	1	0
GGPA3	1	0
GGPA4	0	0
GGPR4	1	0
GGPS4	0	0
GGPK2	0	0
GGPN2	20	0
GGPM2	0	0
GGPI2	0	0
GGPT3	0	0
GGPT4	0	0
GGPW2	0	0
GGPC2	0	0
GGP*2	0	0
GGPY2	0	0
GGPL4	0	0
GGPF2	0	0
GGPS5	0	0
GGPS6	0	0
GGPR5	0	0
GGPR6	3	0
GGPQ2	0	0
GGPH2	0	0
GGPL5	0	0
GGPL6	0	0
GGPP3	0	0
GGPP4	0	0
GGGG5	59	0
GGGG6	90	0
GGGE3	25	0
GGGD3	13	0
GGGV5	0	0
GGGV6	16	0
GGGA5	12	0
GGGA6	0	0
GGGR7	1	0
GGGS7	22	0
GGGK3	3	0
GGGN3	0	0
GGGM3	7	0
GGGI3	1	0
GGGT5	39	0
GGGT6	49	0
GGGW3	44	0
GGGC3	11	0
GGG*3	0	0
GGGY3	13	0
GGGL7	25	0
GGGF3	0	0
GGGS8	4	0
GGGS9	12	0
GGGR8	19	0
GGGR9	44	0
GGGQ3	24	0
GGGH3	1	0
GGGL8	8	0
GGGL9	8	0
GGGP5	5	0
GGGP6	0	0
GGGG7	162	0
GGGG8	13	0
GGGE4	5	0
GGGD4	0	0
GGGV7	48	0
GGGV8	76	0
GGGA7	20	0
GGGA8	21	0
GGGR10	1	0
GGGS10	0	0
GGGK4	5	0
GGGN4	0	0
GGGM4	0	0
GGGI4	25	0
GGGT7	0	0
GGGT8	15	0
GGGW4	6	0
GGGC4	3	0
GGG*4	2	0
GGGY4	0	0
GGGL10	0	0
GGGF4	0	0
GGGS11	2	0
GGGS12	0	0
GGGR11	43	0
GGGR12	0	0
GGGQ4	19	0
GGGH4	0	0
GGGL11	7	0
GGGL12	2	0
GGGP7	6	0
GGGP8	4	0
GGEG3	56	0
GGEG4	7	0
GGEE2	22	0
GGED2	42	0
GGEV3	56	0
GGEV4	0	0
GGEA3	0	0
GGEA4	0	0
GGER4	2	0
GGES4	0	0
GGEK2	2	0
GGEN2	0	0
GGEM2	2	0
GGEI2	0	0
GGET3	0	0
GGET4	0	0
GGEW2	1	0
GGEC2	0	0
GGE*2	0	0
GGEY2	20	0
GGEL4	0	0
GGEF2	3	0
GGES5	8	0
GGES6	18	0
GGER5	1	0
GGER6	0	0
GGEQ2	0	0
GGEH2	0	0
GGEL5	6	0
GGEL6	12	0
GGEP3	1	0
GGEP4	1	0
GGDG3	6	0
GGDG4	0	0
GGDE2	0	0
GGDD2	0	0
GGDV3	0	0
GGDV4	0	0
GGDA3	8	0
GGDA4	32	0
GGDR4	0	0
GGDS4	4	0
GGDK2	0	0
GGDN2	0	0
GGDM2	0	0
GGDI2	4	0
GGDT3	0	0
GGDT4	0	0
GGDW2	5	0
GGDC2	0	0
GGD*2	0	0
GGDY2	0	0
GGDL4	0	0
GGDF2	1	0
GGDS5	0	0
GGDS6	21	0
GGDR5	0	0
GGDR6	0	0
GGDQ2	0	0
GGDH2	0	0
GGDL5	0	0
GGDL6	9	0
GGDP3	0	0
GGDP4	0	0
GGVG5	70	0
GGVG6	10	0
GGVE3	0	0
GGVD3	0	0
GGVV5	0	0
GGVV6	0	0
GGVA5	0	0
GGVA6	44	0
GGVR7	7	0
GGVS7	3	0
GGVK3	12	0
GGVN3	4	0
GGVM3	1	0
GGVI3	17	0
GGVT5	0	0
GGVT6	0	0
GGVW3	19	0
GGVC3	0	0
GGV*3	0	0
GGVY3	0	0
GGVL7	0	0
GGVF3	0	0
GGVS8	0	0
GGVS9	3	0
GGVR8	0	0
GGVR9	13	0
GGVQ3	10	0
GGVH3	0	0
GGVL8	12	0
GGVL9	0	0
GGVP5	20	0
GGVP6	0	0
GGVG7	64	0
GGVG8	13	0
GGVE4	1	0
GGVD4	22	0
GGVV7	19	0
GGVV8	4	0
GGVA7	0	0
GGVA8	0	0
GGVR10	17	0
GGVS10	24	0
GGVK4	0	0
GGVN4	0	0
GGVM4	25	0
GGVI4	0	0
GGVT7	0	0
GGVT8	0	0
GGVW4	0	0
GGVC4	0	0
GGV*4	1	0
GGVY4	1	0
GGVL10	0	0
GGVF4	17	0
GGVS11	8	0
GGVS12	0	0
GGVR11	0	0
GGVR12	0	0
GGVQ4	2	0
GGVH4	0	0
GGVL11	1	0
GGVL12	0	0
GGVP7	1	0
GGVP8	0	0
GGAG5	31	0
GGAG6	28	0
GGAE3	0	0
GGAD3	5	0
GGAV5	9	0
GGAV6	8	0
GGAA5	31	0
GGAA6	23	0
GGAR7	16	0
GGAS7	0	0
GGAK3	0	0
GGAN3	0	0
GGAM3	0	0
GGAI3	0	0
GGAT5	0	0
GGAT6	0	0
GGAW3	8	0
GGAC3	0	0
GGA*3	0	0
GGAY3	31	0
GGAL7	12	0
GGAF3	0	0
GGAS8	0	0
GGAS9	1	0
GGAR8	0	0
GGAR9	0	0
GGAQ3	15	0
GGAH3	0	0
GGAL8	0	0
GGAL9	0	0
GGAP5	0	0
GGAP6	0	0
GGAG7	0	0
GGAG8	43	0
GGAE4	14	0
GGAD4	7	0
GGAV7	20	0
GGAV8	0	0
GGAA7	6	0
GGAA8	0	0
GGAR10	15	0
GGAS10	0	0
GGAK4	0	0
GGAN4	0	0
GGAM4	0	0
GGAI4	0	0
GGAT7	1	0
GGAT8	0	0
GGAW4	0	0
GGAC4	30	0
GGA*4	0	0
GGAY4	17	0
GGAL10	0	0
GGAF4	0	0
GGAS11	0	0
GGAS12	0	0
GGAR11	8	0
GGAR12	3	0
GGAQ4	0	0
GGAH4	0	0
GGAL11	61	0
GGAL12	0	0
GGAP7	0	0
GGAP8	5	0
GGRG7	10	0
GGRG8	52	0
GGRE4	0	0
GGRD4	0	0
GGRV7	4	0
GGRV8	0	0
GGRA7	0	0
GGRA8	9	0
GGRR10	7	0
GGRS10	0	0
GGRK4	0	0
GGRN4	1	0
GGRM4	1	0
GGRI4	0	0
GGRT7	1	0
GGRT8	7	0
GGRW4	0	0
GGRC4	0	0
GGR*4	0	0
GGRY4	0	0
GGRL10	0	0
GGRF4	29	0
GGRS11	0	0
GGRS12	0	0
GGRR11	17	0
GGRR12	3	0
GGRQ4	3	0
GGRH4	0	0
GGRL11	0	0
GGRL12	0	0
GGRP7	23	0
GGRP8	0	0
GGSG7	19	0
GGSG8	0	0
GGSE4	1	0
GGSD4	0	0
GGSV7	37	0
GGSV8	0	0
GGSA7	11	0
GGSA8	0	0
GGSR10	37	0
GGSS10	0	0
GGSK4	0	0
GGSN4	1	0
GGSM4	23	0
GGSI4	14	0
GGST7	0	0
GGST8	0	0
GGSW4	0	0
GGSC4	2	0
GGS*4	0	0
GGSY4	0	0
GGSL10	1	0
GGSF4	0	0
GGSS11	0	0
GGSS12	0	0
GGSR11	0	0
GGSR12	0	0
GGSQ4	53	0
GGSH4	5	0
GGSL11	0	0
GGSL12	0	0
GGSP7	7	0
GGSP8	0	0
GGKG3	1	0
GGKG4	10	0
GGKE2	0	0
GGKD2	0	0
GGKV3	4	0
GGKV4	3	0
GGKA3	0	0
GGKA4	0	0
GGKR4	0	0
GGKS4	0	0
GGKK2	0	0
GGKN2	0	0
GGKM2	9	0
GGKI2	0	0
GGKT3	0	0
GGKT4	0	0
GGKW2	0	0
GGKC2	0	0
GGK*2	6	0
GGKY2	0	0
GGKL4	0	0
GGKF2	1	0
GGKS5	15	0
GGKS6	10	0
GGKR5	0	0
GGKR6	0	0
GGKQ2	0	0
GGKH2	0	0
GGKL5	3	0
GGKL6	0	0
GGKP3	0	0
GGKP4	0	0
GGNG3	18	0
GGNG4	0	0
GGNE2	1	0
GGND2	14	0
GGNV3	0	0
GGNV4	5	0
GGNA3	4	0
GGNA4	0	0
GGNR4	5	0
GGNS4	0	0
GGNK2	0	0
GGNN2	11	0
GGNM2	0	0
GGNI2	0	0
GGNT3	0	0
GGNT4	0	0
GGNW2	3	0
GGNC2	0	0
GGN*2	0	0
GGNY2	0	0
GGNL4	13	0
GGNF2	12	0
GGNS5	0	0
GGNS6	0	0
GGNR5	18	0
GGNR6	0	0
GGNQ2	0	0
GGNH2	0	0
GGNL5	0	0
GGNL6	0	0
GGNP3	0	0
GGNP4	6	0
GGMG3	0	0
GGMG4	0	0
GGME2	18	0
GGMD2	0	0
GGMV3	0	0
GGMV4	0	0
GGMA3	22	0
GGMA4	1	0
GGMR4	2	0
GGMS4	0	0
GGMK2	0	0
GGMN2	1	0
GGMM2	0	0
GGMI2	0	0
GGMT3	0	0
GGMT4	1	0
GGMW2	4	0
GGMC2	0	0
GGM*2	0	0
GGMY2	0	0
GGML4	0	0
GGMF2	0	0
GGMS5	0	0
GGMS6	0	0
GGMR5	0	0
GGMR6	13	0
GGMQ2	0	0
GGMH2	0	0
GGML5	0	0
GGML6	10	0
GGMP3	0	0
GGMP4	0	0
GGIG3	0	0
GGIG4	0	0
GGIE2	0	0
GGID2	0	0
GGIV3	0	0
GGIV4	0	0
GGIA3	0	0
GGIA4	0	0
GGIR4	0	0
GGIS4	0	0
GGIK2	0	0
GGIN2	0	0
GGIM2	0	0
GGII2	1	0
GGIT3	2	0
GGIT4	11	0
GGIW2	0	0
GGIC2	0	0
GGI*2	1	0
GGIY2	0	0
GGIL4	0	0
GGIF2	0	0
GGIS5	0	0
GGIS6	20	0
GGIR5	0	0
GGIR6	0	0
GGIQ2	0	0
GGIH2	0	0
GGIL5	0	0
GGIL6	1	0
GGIP3	0	0
GGIP4	0	0
GGTG5	10	0
GGTG6	0	0
GGTE3	0	0
GGTD3	0	0
GGTV5	11	0
GGTV6	0	0
GGTA5	66	0
GGTA6	0	0
GGTR7	0	0
GGTS7	1	0
GGTK3	6	0
GGTN3	0	0
GGTM3	0	0
GGTI3	1	0
GGTT5	0	0
GGTT6	1	0
GGTW3	0	0
GGTC3	0	0
GGT*3	0	0
GGTY3	0	0
GGTL7	0	0
GGTF3	0	0
GGTS8	7	0
GGTS9	0	0
GGTR8	0	0
GGTR9	0	0
GGTQ3	0	0
GGTH3	3	0
GGTL8	0	0
GGTL9	0	0
GGTP5	0	0
GGTP6	0	0
GGTG7	8	0
GGTG8	2	0
GGTE4	0	0
GGTD4	0	0
GGTV7	32	0
GGTV8	0	0
GGTA7	0	0
GGTA8	0	0
GGTR10	0	0
GGTS10	0	0
GGTK4	8	0
GGTN4	11	0
GGTM4	0	0
GGTI4	0	0
GGTT7	0	0
GGTT8	0	0
GGTW4	0	0
GGTC4	6	0
GGT*4	0	0
GGTY4	0	0
GGTL10	5	0
GGTF4	0	0
GGTS11	0	0
GGTS12	0	0
GGTR11	0	0
GGTR12	0	0
GGTQ4	0	0
GGTH4	0	0
GGTL11	0	0
GGTL12	0	0
GGTP7	0	0
GGTP8	0	0
GGWG3	21	0
GGWG4	15	0
GGWE2	10	0
GGWD2	0	0
GGWV3	25	0
GGWV4	0	0
GGWA3	0	0
GGWA4	23	0
GGWR4	29	0
GGWS4	1	0
GGWK2	26	0
GGWN2	0	0
GGWM2	0	0
GGWI2	0	0
GGWT3	0	0
GGWT4	1	0
GGWW2	15	0
GGWC2	0	0
GGW*2	0	0
GGWY2	0	0
GGWL4	0	0
GGWF2	3	0
GGWS5	15	0
GGWS6	0	0
GGWR5	19	0
GGWR6	0	0
GGWQ2	0	0
GGWH2	0	0
GGWL5	0	0
GGWL6	0	0
GGWP3	0	0
GGWP4	0	0
GGCG3	10	0
GGCG4	4	0
GGCE2	4	0
GGCD2	29	0
GGCV3	14	0
GGCV4	55	0
GGCA3	1	0
GGCA4	0	0
GGCR4	0	0
GGCS4	1	0
GGCK2	0	0
GGCN2	0	0
GGCM2	0	0
GGCI2	21	0
GGCT3	0	0
GGCT4	16	0
GGCW2	5	0
GGCC2	27	0
GGC*2	0	0
GGCY2	0	0
GGCL4	0	0
GGCF2	20	0
GGCS5	0	0
GGCS6	10	0
GGCR5	0	0
GGCR6	0	0
GGCQ2	0	0
GGCH2	0	0
GGCL5	0	0
GGCL6	2	0
GGCP3	0	0
GGCP4	0	0
GG*G3	0	0
GG*G4	1	0
GG*E2	0	0
GG*D2	0	0
GG*V3	0	0
GG*V4	0	0
GG*A3	0	0
GG*A4	0	0
GG*R4	0	0
GG*S4	9	0
GG*K2	0	0
GG*N2	3	0
GG*M2	0	0
GG*I2	0	0
GG*T3	0	0
GG*T4	0	0
GG*W2	0	0
GG*C2	0	0
GG**2	0	0
GG*Y2	1	0
GG*L4	0	0
GG*F2	0	0
GG*S5	0	0
GG*S6	0	0
GG*R5	0	0
GG*R6	0	0
GG*Q2	0	0
GG*H2	0	0
GG*L5	0	0
GG*L6	0	0
GG*P3	10	0
GG*P4	8	0
GGYG3	1	0
GGYG4	9	0
GGYE2	0	0
GGYD2	4	0
GGYV3	0	0
GGYV4	0	0
GGYA3	0	0
GGYA4	0	0
GGYR4	0	0
GGYS4	0	0
GGYK2	0	0
GGYN2	0	0
GGYM2	1	0
GGYI2	0	0
GGYT3	0	0
GGYT4	0	0
GGYW2	1	0
GGYC2	0	0
GGY*2	0	0
GGYY2	0	0
GGYL4	0	0
GGYF2	60	0
GGYS5	0	0
GGYS6	27	0
GGYR5	0	0
GGYR6	0	0
GGYQ2	0	0
GGYH2	11	0
GGYL5	0	0
GGYL6	0	0
GGYP3	23	0
GGYP4	0	0
GGLG7	17	0
GGLG8	0	0
GGLE4	1	0
GGLD4	13	0
GGLV7	0	0
GGLV8	1	0
GGLA7	1	0
GGLA8	3	0
GGLR10	32	0
GGLS10	3	0
GGLK4	0	0
GGLN4	0	0
GGLM4	0	0
GGLI4	0	0
GGLT7	0	0
GGLT8	0	0
GGLW4	0	0
GGLC4	0	0
GGL*4	0	0
GGLY4	5	0
GGLL10	0	0
GGLF4	0	0
GGLS11	0	0
GGLS12	0	0
GGLR11	1	0
GGLR12	15	0
GGLQ4	0	0
GGLH4	0	0
GGLL11	0	0
GGLL12	0	0
GGLP7	0	0
GGLP8	0	0
GGFG3	0	0
GGFG4	1	0
GGFE2	0	0
GGFD2	0	0
GGFV3	9	0
GGFV4	7	0
GGFA3	0	0
GGFA4	0	0
GGFR4	0	0
GGFS4	9	0
GGFK2	0	0
GGFN2	0	0
GGFM2	0	0
GGFI2	0	0
GGFT3	0	0
GGFT4	33	0
GGFW2	0	0
GGFC2	0	0
GGF*2	0	0
GGFY2	0	0
GGFL4	22	0
GGFF2	2	0
GGFS5	0	0
GGFS6	0	0
GGFR5	0	0
GGFR6	1	0
GGFQ2	0	0
GGFH2	0	0
GGFL5	0	0
GGFL6	0	0
GGFP3	12	0
GGFP4	0	0
GGSG9	30	0
GGSG10	0	0
GGSE5	0	0
GGSD5	0	0
GGSV9	0	0
GGSV10	10	0
GGSA9	0	0
GGSA10	1	0
GGSR13	0	0
GGSS13	7	0
GGSK5	17	0
GGSN5	1	0
GGSM5	0	0
GGSI5	0	0
GGST9	0	0
GGST10	0	0
GGSW5	11	0
GGSC5	0	0
GGS*5	0	0
GGSY5	0	0
GGSL13	0	0
GGSF5	0	0
GGSS14	0	0
GGSS15	0	0
GGSR14	0	0
GGSR15	0	0
GGSQ5	0	0
GGSH5	0	0
GGSL14	0	0
GGSL15	0	0
GGSP9	0	0
GGSP10	0	0
GGSG11	0	0
GGSG12	0	0
GGSE6	15	0
GGSD6	7	0
GGSV11	15	0
GGSV12	0	0
GGSA11	6	0
GGSA12	0	0
GGSR16	26	0
GGSS16	0	0
GGSK6	0	0
GGSN6	0	0
GGSM6	0	0
GGSI6	0	0
GGST11	0	0
GGST12	0	0
GGSW6	0	0
GGSC6	4	0
GGS*6	0	0
GGSY6	0	0
GGSL16	0	0
GGSF6	9	0
GGSS17	0	0
GGSS18	20	0
GGSR17	0	0
GGSR18	0	0
GGSQ6	0	0
GGSH6	0	0
GGSL17	0	0
GGSL18	0	0
GGSP11	0	0
GGSP12	0	0
GGRG9	87	0
GGRG10	33	0
GGRE5	19	0
GGRD5	6	0
GGRV9	4	0
GGRV10	2	0
GGRA9	16	0
GGRA10	0	0
GGRR13	8	0
GGRS13	0	0
GGRK5	0	0
GGRN5	50	0
GGRM5	0	0
GGRI5	6	0
GGRT9	0	0
GGRT10	0	0
GGRW5	7	0
GGRC5	4	0
GGR*5	22	0
GGRY5	0	0
GGRL13	3	0
GGRF5	0	0
GGRS14	0	0
GGRS15	19	0
GGRR14	11	0
GGRR15	0	0
GGRQ5	25	0
GGRH5	0	0
GGRL14	0	0
GGRL15	0	0
GGRP9	10	0
GGRP10	4	0
GGRG11	74	0
GGRG12	9	0
GGRE6	25	0
GGRD6	0	0
GGRV11	46	0
GGRV12	12	0
GGRA11	14	0
GGRA12	0	0
GGRR16	12	0
GGRS16	2	0
GGRK6	1	0
GGRN6	0	0
GGRM6	0	0
GGRI6	0	0
GGRT11	18	0
GGRT12	0	0
GGRW6	1	0
GGRC6	4	0
GGR*6	0	0
GGRY6	21	0
GGRL16	0	0
GGRF6	46	0
GGRS17	0	0
GGRS18	0	0
GGRR17	0	0
GGRR18	0	0
GGRQ6	26	0
GGRH6	22	0
GGRL17	2	0
GGRL18	3	0
GGRP11	14	0
GGRP12	19	0
GGQG3	0	0
GGQG4	0	0
GGQE2	0	0
GGQD2	0	0
GGQV3	0	0
GGQV4	0	0
GGQA3	8	0
GGQA4	1	0
GGQR4	0	0
GGQS4	0	0
GGQK2	0	0
GGQN2	0	0
GGQM2	0	0
GGQI2	0	0
GGQT3	0	0
GGQT4	0	0
GGQW2	3	0
GGQC2	13	0
GGQ*2	0	0
GGQY2	0	0
GGQL4	0	0
GGQF2	0	0
GGQS5	0	0
GGQS6	0	0
GGQR5	5	0
GGQR6	0	0
GGQQ2	0	0
GGQH2	44	0
GGQL5	0	0
GGQL6	0	0
GGQP3	0	0
GGQP4	0	0
GGHG3	24	0
GGHG4	0	0
GGHE2	4	0
GGHD2	4	0
GGHV3	0	0
GGHV4	0	0
GGHA3	6	0
GGHA4	0	0
GGHR4	0	0
GGHS4	0	0
GGHK2	0	0
GGHN2	0	0
GGHM2	0	0
GGHI2	0	0
GGHT3	11	0
GGHT4	0	0
GGHW2	1	0
GGHC2	0	0
GGH*2	0	0
GGHY2	0	0
GGHL4	19	0
GGHF2	32	0
GGHS5	0	0
GGHS6	0	0
GGHR5	7	0
GGHR6	1	0
GGHQ2	0	0
GGHH2	10	0
GGHL5	6	0
GGHL6	0	0
GGHP3	0	0
GGHP4	0	0
GGLG9	30	0
GGLG10	0	0
GGLE5	0	0
GGLD5	0	0
GGLV9	0	0
GGLV10	5	0
GGLA9	0	0
GGLA10	1	0
GGLR13	0	0
GGLS13	1	0
GGLK5	3	0
GGLN5	5	0
GGLM5	0	0
GGLI5	29	0
GGLT9	0	0
GGLT10	0	0
GGLW5	0	0
GGLC5	8	0
GGL*5	0	0
GGLY5	0	0
GGLL13	0	0
GGLF5	0	0
GGLS14	4	0
GGLS15	0	0
GGLR14	0	0
GGLR15	10	0
GGLQ5	0	0
GGLH5	0	0
GGLL14	0	0
GGLL15	0	0
GGLP9	29	0
GGLP10	0	0
GGLG11	0	0
GGLG12	0	0
GGLE6	3	0
GGLD6	0	0
GGLV11	0	0
GGLV12	0	0
GGLA11	0	0
GGLA12	5	0
GGLR16	26	0
GGLS16	15	0
GGLK6	0	0
GGLN6	0	0
GGLM6	0	0
GGLI6	0	0
GGLT11	0	0
GGLT12	0	0
GGLW6	0	0
GGLC6	10	0
GGL*6	4	0
GGLY6	0	0
GGLL16	0	0
GGLF6	0	0
GGLS17	0	0
GGLS18	0	0
GGLR17	56	0
GGLR18	1	0
GGLQ6	6	0
GGLH6	0	0
GGLL17	0	0
GGLL18	0	0
GGLP11	0	0
GGLP12	0	0
GGPG5	39	0
GGPG6	1	0
GGPE3	20	0
GGPD3	14	0
GGPV5	1	0
GGPV6	1	0
GGPA5	0	0
GGPA6	26	0
GGPR7	6	0
GGPS7	1	0
GGPK3	0	0
GGPN3	0	0
GGPM3	0	0
[truncated: 1,046,576+ more rows]
